# Supplementary material for: Boosting photocatalytic H2O2 production in pure water over a plasmonic photocatalyst with polyethylenimine modification
Source: Royal Society of Chemistry journal article supplement (doi:10.1039/d2ta08203a), 2022-12-09
Supplement: d2ta08203a1.pdf [file d2ta08203a1.pdf]

## Supporting Materials

### **Boosting photocatalytic H<sub>2</sub>O<sub>2</sub> production in pure water over plasmonic photocatalyst with polyethylenimine modification**

*Xiangming Li<sup>a</sup>, Junjia Zhu<sup>a</sup>, Bo Sun<sup>a</sup>, Qi Yuan<sup>a</sup>, Haitao Li<sup>b</sup>, Zequn Ma<sup>\*c</sup>, Tiwen Xu<sup>\*a</sup>, Xingyuan Chen<sup>d</sup>, Meng Fu<sup>\*a</sup>*

<sup>a</sup>School of Materials Sciences and Technology, Guangdong University of Petrochemical Technology, Maoming, 525000, China.

<sup>b</sup>School of Chemistry and Chemical Engineering, Yangzhou University, Yangzhou, 225002, China.

<sup>c</sup>Institute of Materials Science and Devices, School of Materials Science and Engineering, Suzhou University of Science and Technology, Suzhou, 215009, China.

<sup>d</sup>Department of Physics, School of Science, Guangdong University of Petrochemical Technology, Maoming, 525000, China.

E-mail: fm@gdupt.edu.cn, twxu2017@gmail.com, mazequn@usts.edu.cn

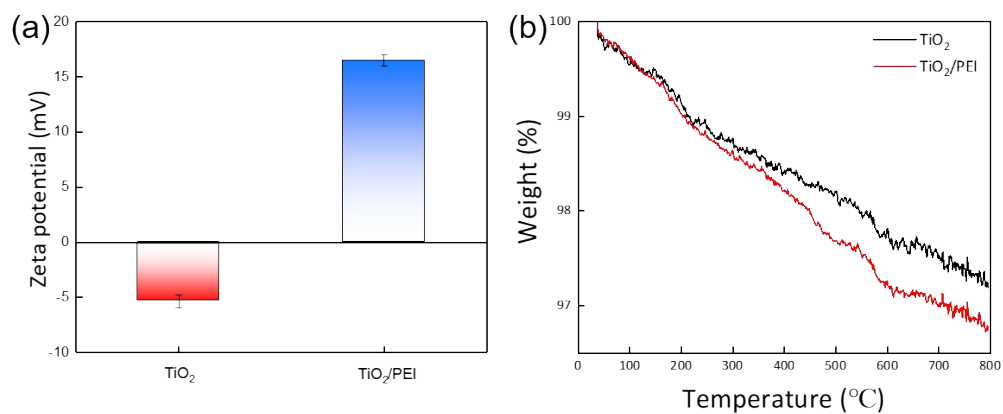

**Figure S1.** (a) Zeta potential and (b) TGA curves of  $\text{TiO}_2$  and  $\text{TiO}_2/\text{PEI}$ .

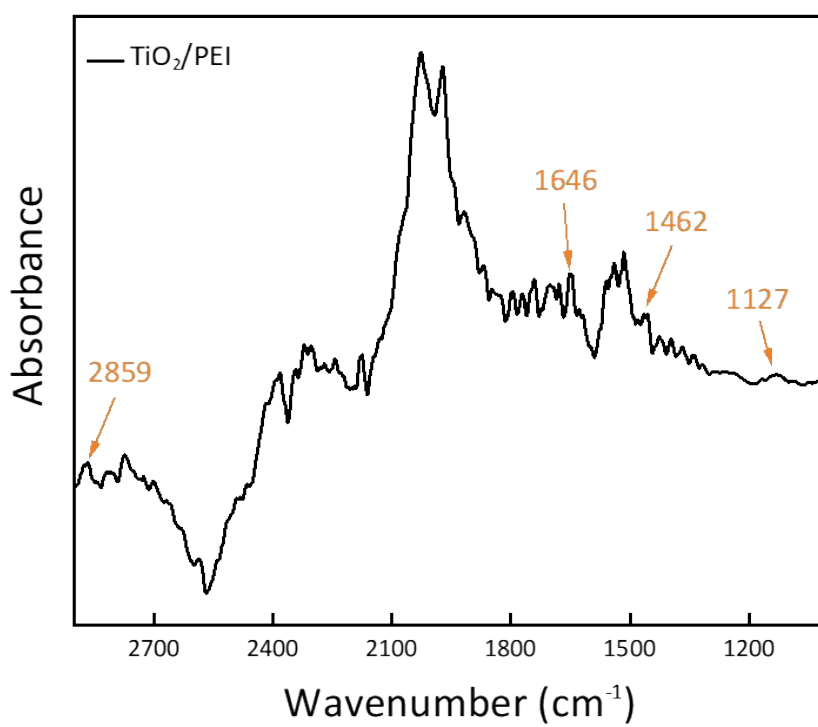

**Figure S2.** ATR-FTIR spectra of  $\text{TiO}_2/\text{PEI}$ .

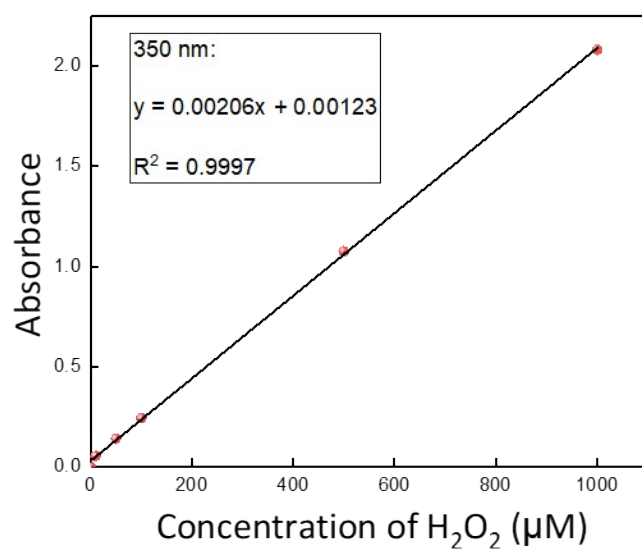

**Figure S3.** The calibration curve for different  $\text{H}_2\text{O}_2$  concentrations used in this paper.

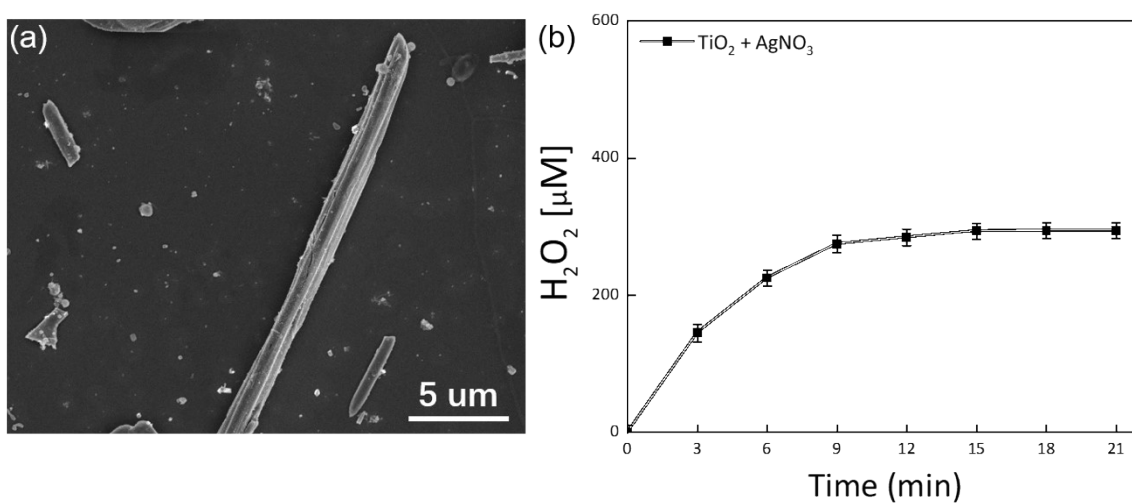

**Figure S4.** (a) SEM image of the  $\text{TiO}_2/\text{Ag}$  and (b) Time course for  $\text{H}_2\text{O}_2$  production with  $\text{TiO}_2/\text{Ag}$  as photocatalyst in pure water under sun light.

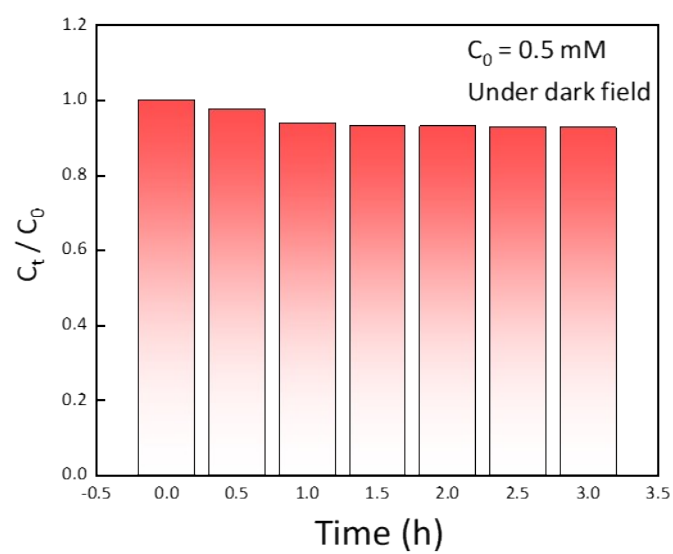

**Figure S5.** Decomposition of  $\text{H}_2\text{O}_2$  by  $\text{TiO}_2/\text{PEI}/\text{AgNP}$  under dark field, the concentration of  $\text{H}_2\text{O}_2$  is 0.5 mM.

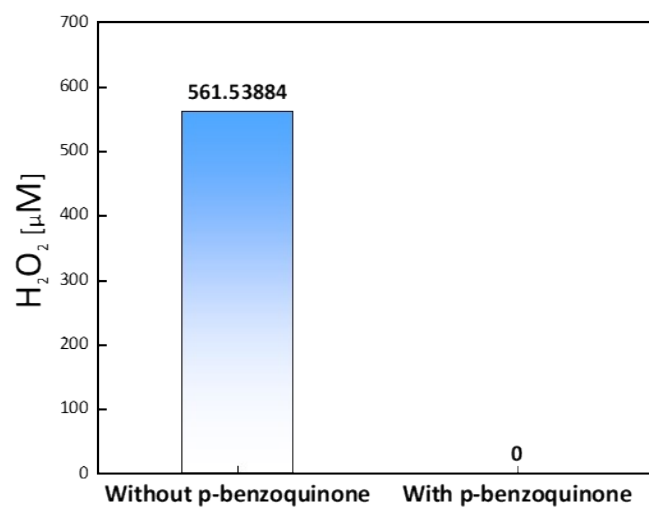

**Figure S6.** Photocatalytic  $\text{H}_2\text{O}_2$  production of  $\text{TiO}_2/\text{PEI}/\text{AgNP}$  with or without  $\cdot\text{O}_2^-$  scavenger p-benzoquinone (0.5 mM) under sun light.

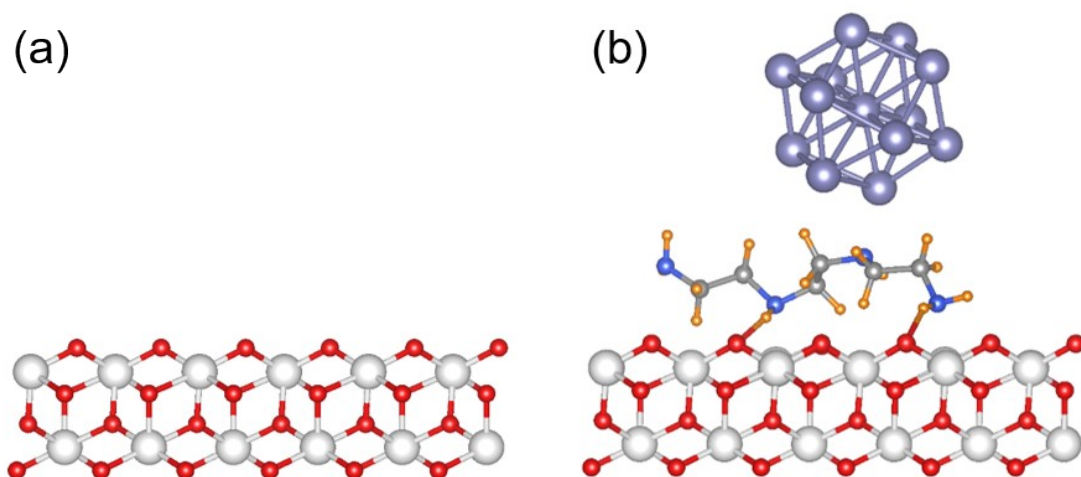

**Figure S7.** DFT calculations. Optimized structures of (a)  $\text{TiO}_2$  and (b)  $\text{TiO}_2/\text{PEI}/\text{AgNP}$ , respectively. C, N, H, O, Ti, and Ag atoms represented as grey, blue, orange, red, white and purple spheres, respectively.

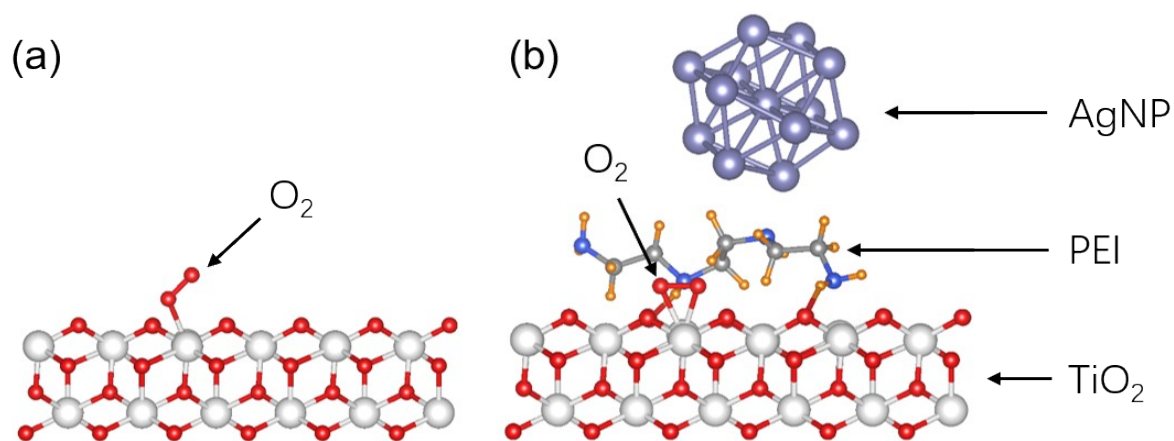

**Figure S8.** DFT calculations. Optimized structures for the  $\text{O}_2$  molecule adsorbed on (a)  $\text{TiO}_2$ , and (b)  $\text{TiO}_2/\text{PEI}/\text{AgNP}$ , respectively. C, N, H, O, Ti, and Ag atoms represented as grey, blue, orange, red, white and purple spheres, respectively.

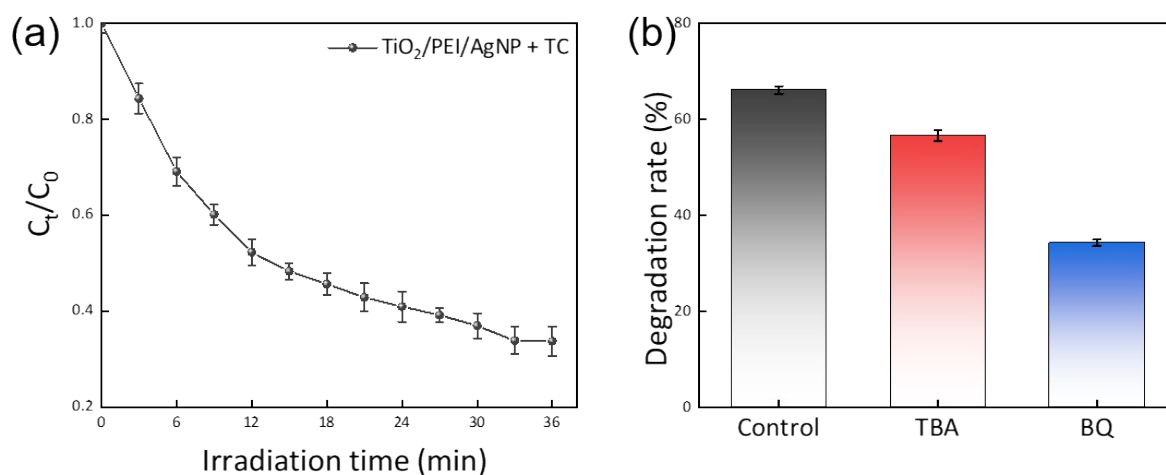

**Figure S9.** (a) Degradation dynamics curve of tetracycline (TC) over TiO<sub>2</sub>/PEI/AgNP and (b) Degradation of TC by TiO<sub>2</sub>/PEI/AgNP in the presence of different scavengers. TC: 20 mg/L, 30 mL. Samples: 6 mg. Light source: sunlight.

**Table S1.** Comparison of photocatalytic H<sub>2</sub>O<sub>2</sub> production in pure water by different catalysts.

| Photocatalysts                                                    | Catalyst (g·L <sup>-1</sup> ) | Light source     | Reaction solvent                    | H <sub>2</sub> O <sub>2</sub> synthesis rate (μmol·g <sup>-1</sup> ·h <sup>-1</sup> ) | Ref.             |
|-------------------------------------------------------------------|-------------------------------|------------------|-------------------------------------|---------------------------------------------------------------------------------------|------------------|
| PEI/C <sub>3</sub> N <sub>4</sub>                                 | 1                             | sun light        | O <sub>2</sub> saturated pure water | 208.1                                                                                 | 43               |
| In <sub>2</sub> S <sub>3</sub> @Ov/In <sub>2</sub> O <sub>3</sub> | 0.75                          | visible light    | O <sub>2</sub> saturated pure water | 275.4                                                                                 | 44               |
| ORP/GCN                                                           | 1                             | visible light    | O <sub>2</sub> saturated pure water | 125                                                                                   | 45               |
| RF resin                                                          | 1.7                           | visible light    | O <sub>2</sub> saturated pure water | 2.4                                                                                   | 3                |
| 5Cv@g-C <sub>3</sub> N <sub>4</sub>                               | 1                             | sun light        | O <sub>2</sub> saturated pure water | 219.1                                                                                 | 46               |
| PFBT/TiO <sub>2</sub>                                             | 1                             | visible light    | O <sub>2</sub> saturated pure water | 55.2                                                                                  | 47               |
| <b>TiO<sub>2</sub>/PEI/AgNP</b>                                   | <b>1</b>                      | <b>sun light</b> | <b>pure water</b>                   | <b>1605</b>                                                                           | <b>this work</b> |
